# Supplementary material for: 2D facial landmark localization method for multi-view face synthesis image using a two-pathway generative adversarial network approach
Source: PeerJ journal article supplement (doi:10.7717/peerj-cs.897), 2022-02-16
Supplement: Appendix.pdf [file Appendix.pdf]

1 **Appendix:**

2

3 Table 1:

4 Patches size or shape guideline.  $W$  and  $H$  is the image width and height dimension.

5

| Method    | Dataset     | Profile image size        | Patches shape size                                                                                                                                  |
|-----------|-------------|---------------------------|-----------------------------------------------------------------------------------------------------------------------------------------------------|
| TP-GAN    | • Multi-PLE | $128 \times 128 \times 3$ | <i>Eyes shape: <math>W40 \times H40</math></i><br><i>Nose shape: <math>W32 \times H40</math></i><br><i>Mouth shape: <math>W32 \times H48</math></i> |
|           | • FEI       | $128 \times 128 \times 3$ |                                                                                                                                                     |
| LFMTP-GAN | • Multi-PLE | $128 \times 128 \times 3$ |                                                                                                                                                     |
|           | • FEI       | $128 \times 128 \times 3$ |                                                                                                                                                     |

6

7

8 Table 2:

9 The  $\{G_{\theta_E^l}, G_{\theta_b^l}\}$  structure of the local pathway.  $W$  and  $H$  is the image width and height

10 dimension.

11

| Layer                                            | Input | Filter size           | Output size                 |
|--------------------------------------------------|-------|-----------------------|-----------------------------|
| <i>Local encoder <math>G_{\theta_E^l}</math></i> |       |                       |                             |
| conv0                                            | ---   | $3 \times 3 / 1$      | $w \times h \times 64$      |
| conv1                                            | ---   | $3 \times 3 / 2$      | $w/2 \times h/2 \times 128$ |
| conv2                                            | ---   | $3 \times 3 / 2$      | $w/4 \times h/4 \times 256$ |
| conv3                                            | ---   | $3 \times 3 / 2$      | $w/8 \times h/8 \times 512$ |
| <i>Local decoder <math>G_{\theta_b^l}</math></i> |       |                       |                             |
| deconv0                                          | ---   | $3 \times 3 / 2$      | $w/4 \times h/4 \times 256$ |
| conv4                                            | conv2 | $3 \times 3 / 1$      | $w/4 \times h/4 \times 256$ |
| deconv1                                          | ---   | $3 \times 3 / 2$      | $w/2 \times h/2 \times 128$ |
| conv5                                            | conv1 | $3 \times 3 / 1$      | $w/2 \times h/2 \times 128$ |
| deconv2                                          | ---   | $3 \times 3 / 2$      | $w \times h \times 64$      |
| conv6                                            | conv0 | $3 \times 3 / 1$      | $w \times h \times 64$      |
| feat                                             | conv6 | $3 \times 3 \times 1$ | $w \times h \times 3$       |

12

13  
14  
15  
16

Table 3:  
The  $\{G_{\theta_E^g}\}$  structure of the global pathway.

| Layer | Filter size      | Output size                |
|-------|------------------|----------------------------|
| conv0 | $7 \times 7 / 1$ | $128 \times 128 \times 64$ |
| conv1 | $5 \times 5 / 2$ | $64 \times 64 \times 64$   |
| conv2 | $3 \times 3 / 2$ | $32 \times 32 \times 128$  |
| conv3 | $3 \times 3 / 2$ | $16 \times 16 \times 256$  |
| conv4 | $3 \times 3 / 2$ | $8 \times 8 \times 512$    |
| fc1   | ---              | 512                        |
| fc2   | ---              | 256                        |

17  
18  
19  
20  
21  
22

Table 4:  
The  $\{G_{\theta_D^g}\}$  structure of the global pathway. The *convs* in *input* column refer to those in *Table .*  
 $I^P$  is the profile image.

| Layer   | Input                | Filter size      | Output size                |
|---------|----------------------|------------------|----------------------------|
| feat8   | fc2.x                | ---              | $8 \times 8 \times 64$     |
| feat32  | ---                  | $3 \times 3 / 4$ | $32 \times 32 \times 32$   |
| feat64  | ---                  | $3 \times 3 / 2$ | $64 \times 64 \times 16$   |
| feat128 | ---                  | $3 \times 3 / 2$ | $128 \times 128 \times 8$  |
| deconv0 | feat8, conv4         | $3 \times 3 / 2$ | $16 \times 16 \times 512$  |
| deconv1 | conv3                | $3 \times 3 / 2$ | $32 \times 32 \times 256$  |
| deconv2 | feat32, conv2, $I^P$ | $3 \times 3 / 2$ | $64 \times 64 \times 128$  |
| deconv3 | feat64, conv1, $I^P$ | $3 \times 3 / 2$ | $128 \times 128 \times 64$ |

23  
24  
25  
26

Table 5:  
The structure of 5, 6 and 7 ConvNet-layers.  $I^P$  is the profile image.

27

| Layer | Input                        | Filter size      | Output size                |
|-------|------------------------------|------------------|----------------------------|
| conv5 | feat128, conv1, local, $I^P$ | $5 \times 5 / 1$ | $128 \times 128 \times 64$ |
| conv6 | ---                          | $3 \times 3 / 1$ | $128 \times 128 \times 32$ |
| conv7 | ---                          | $3 \times 3 / 1$ | $128 \times 128 \times 3$  |

28

29
